# Supplementary material for: Homeodomain proteins: an update
Source: PubMed Central journal article supplement (PMC4901127; doi:10.1007/s00412-015-0543-8), 2015-10-13
Supplement: 412_2015_543_MOESM3_ESM.pdf [file 412_2015_543_MOESM3_ESM.pdf]

| ZF family | Name                          | Protein structure |
|-----------|-------------------------------|-------------------|
| Adnp      | h ADNP                        |                   |
|           | h ADNP2                       |                   |
| Tshz      | h TSHZ1                       |                   |
|           | h TSHZ2                       |                   |
|           | h TSHZ3                       |                   |
|           | <i>Drosophila</i> Tsh (no HD) |                   |
| Zeb       | h ZEB1                        |                   |
|           | h ZEB2                        |                   |
|           | <i>Drosophila</i> Zfh1        |                   |

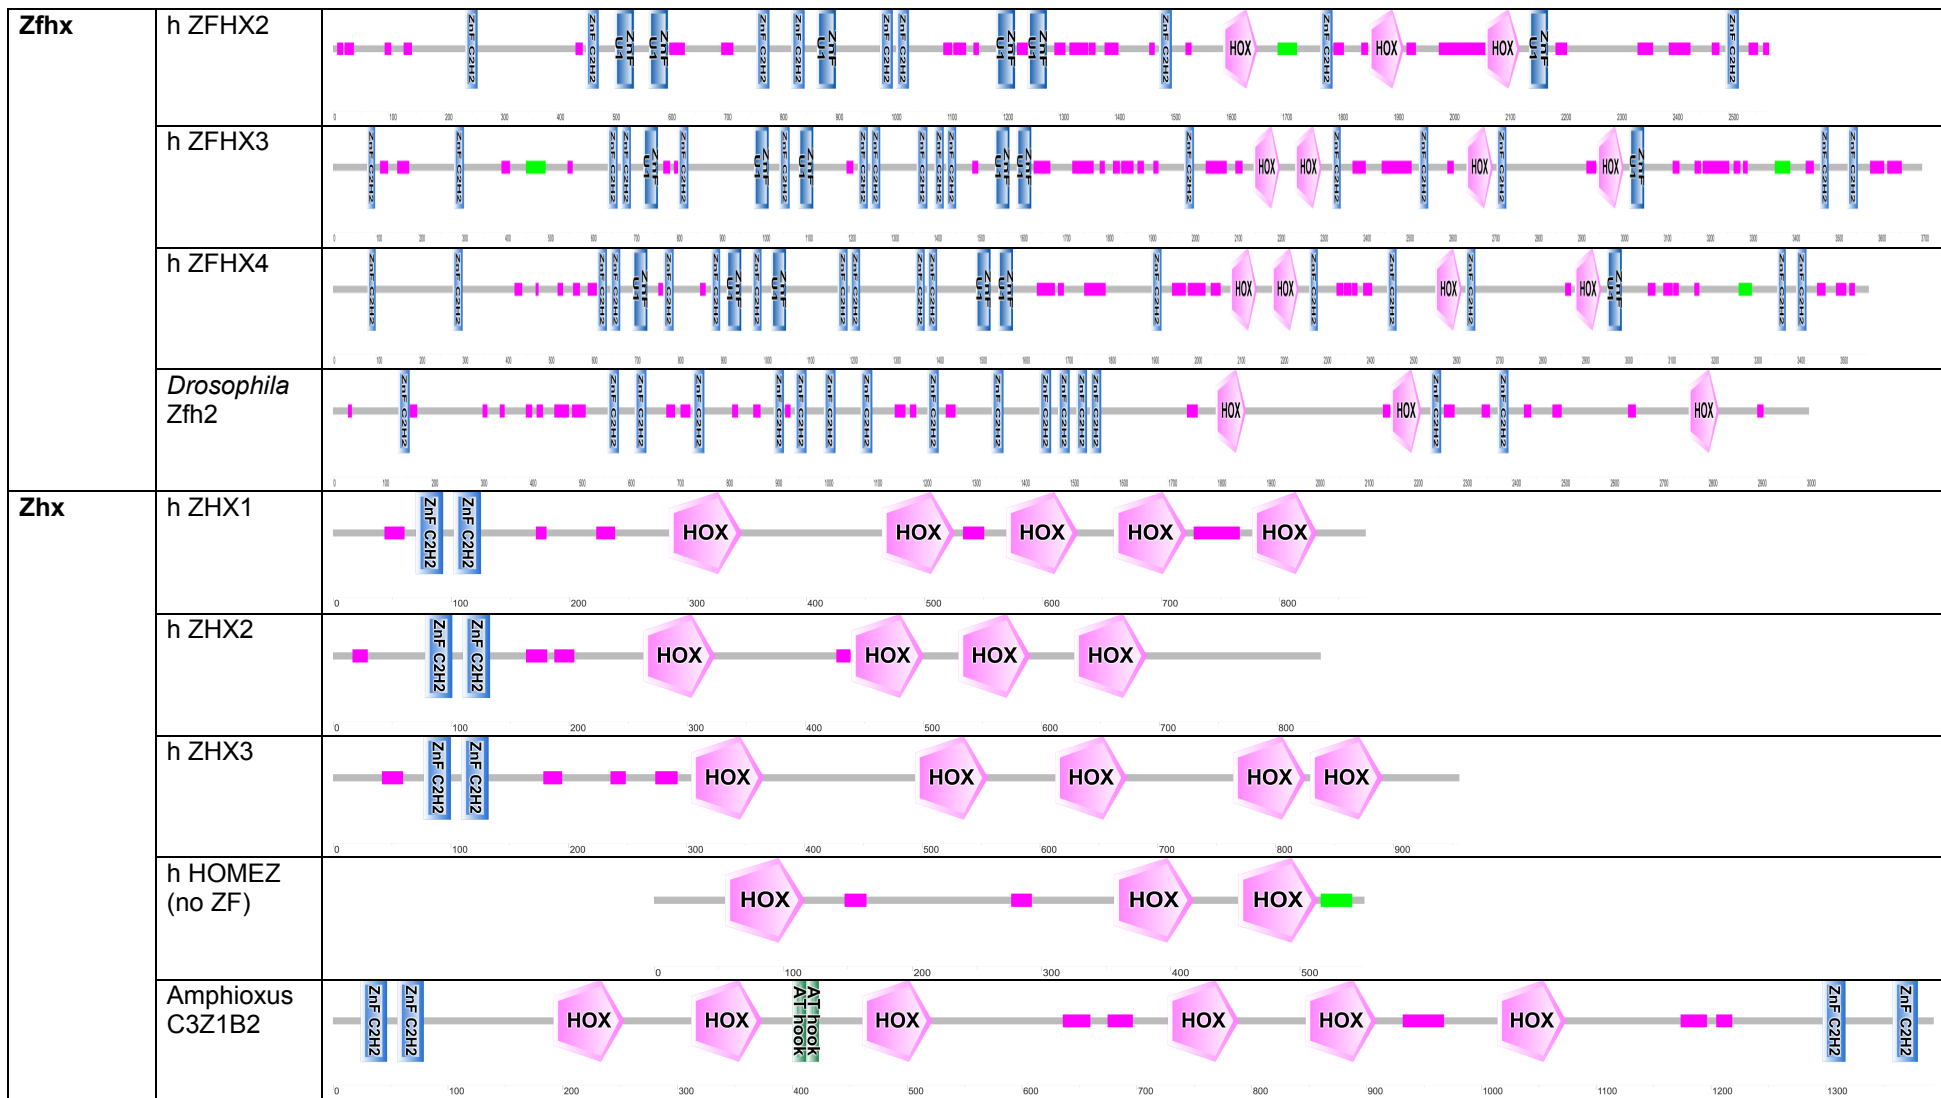

**Sup. Fig. S3** Schematic domain organization of ZF HD proteins.
