# Supplementary material for: Homeodomain proteins: an update
Source: PubMed Central journal article supplement (PMC4901127; doi:10.1007/s00412-015-0543-8), 2015-10-13

**Sup. Fig. S4** 3D crystal structure of the HDs of yeast MAT $\alpha$ 2 and MAT $\alpha$ 1 with water molecules.

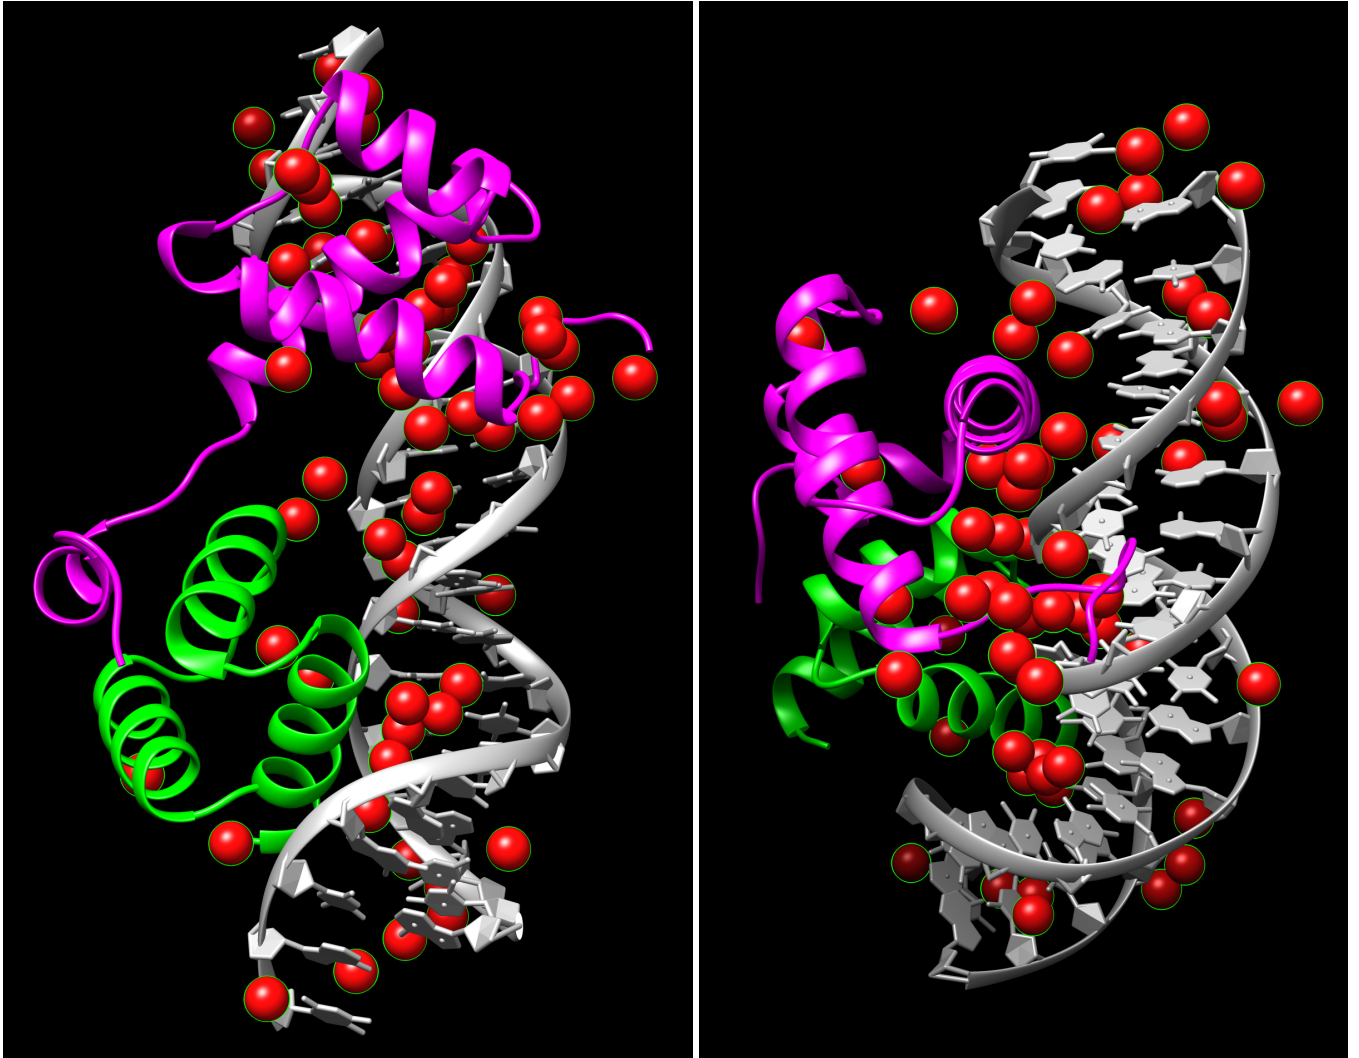

Supplement: 412_2015_543_MOESM4_ESM.pdf [file 412_2015_543_MOESM4_ESM.pdf]
