# Supplementary material for: Homeodomain proteins: an update
Source: PubMed Central journal article supplement (PMC4901127; doi:10.1007/s00412-015-0543-8), 2015-10-13
Supplement: 412_2015_543_MOESM5_ESM.pdf [file 412_2015_543_MOESM5_ESM.pdf]

# Sup. Fig. S5 Sequence alignment of selected PRD class proteins

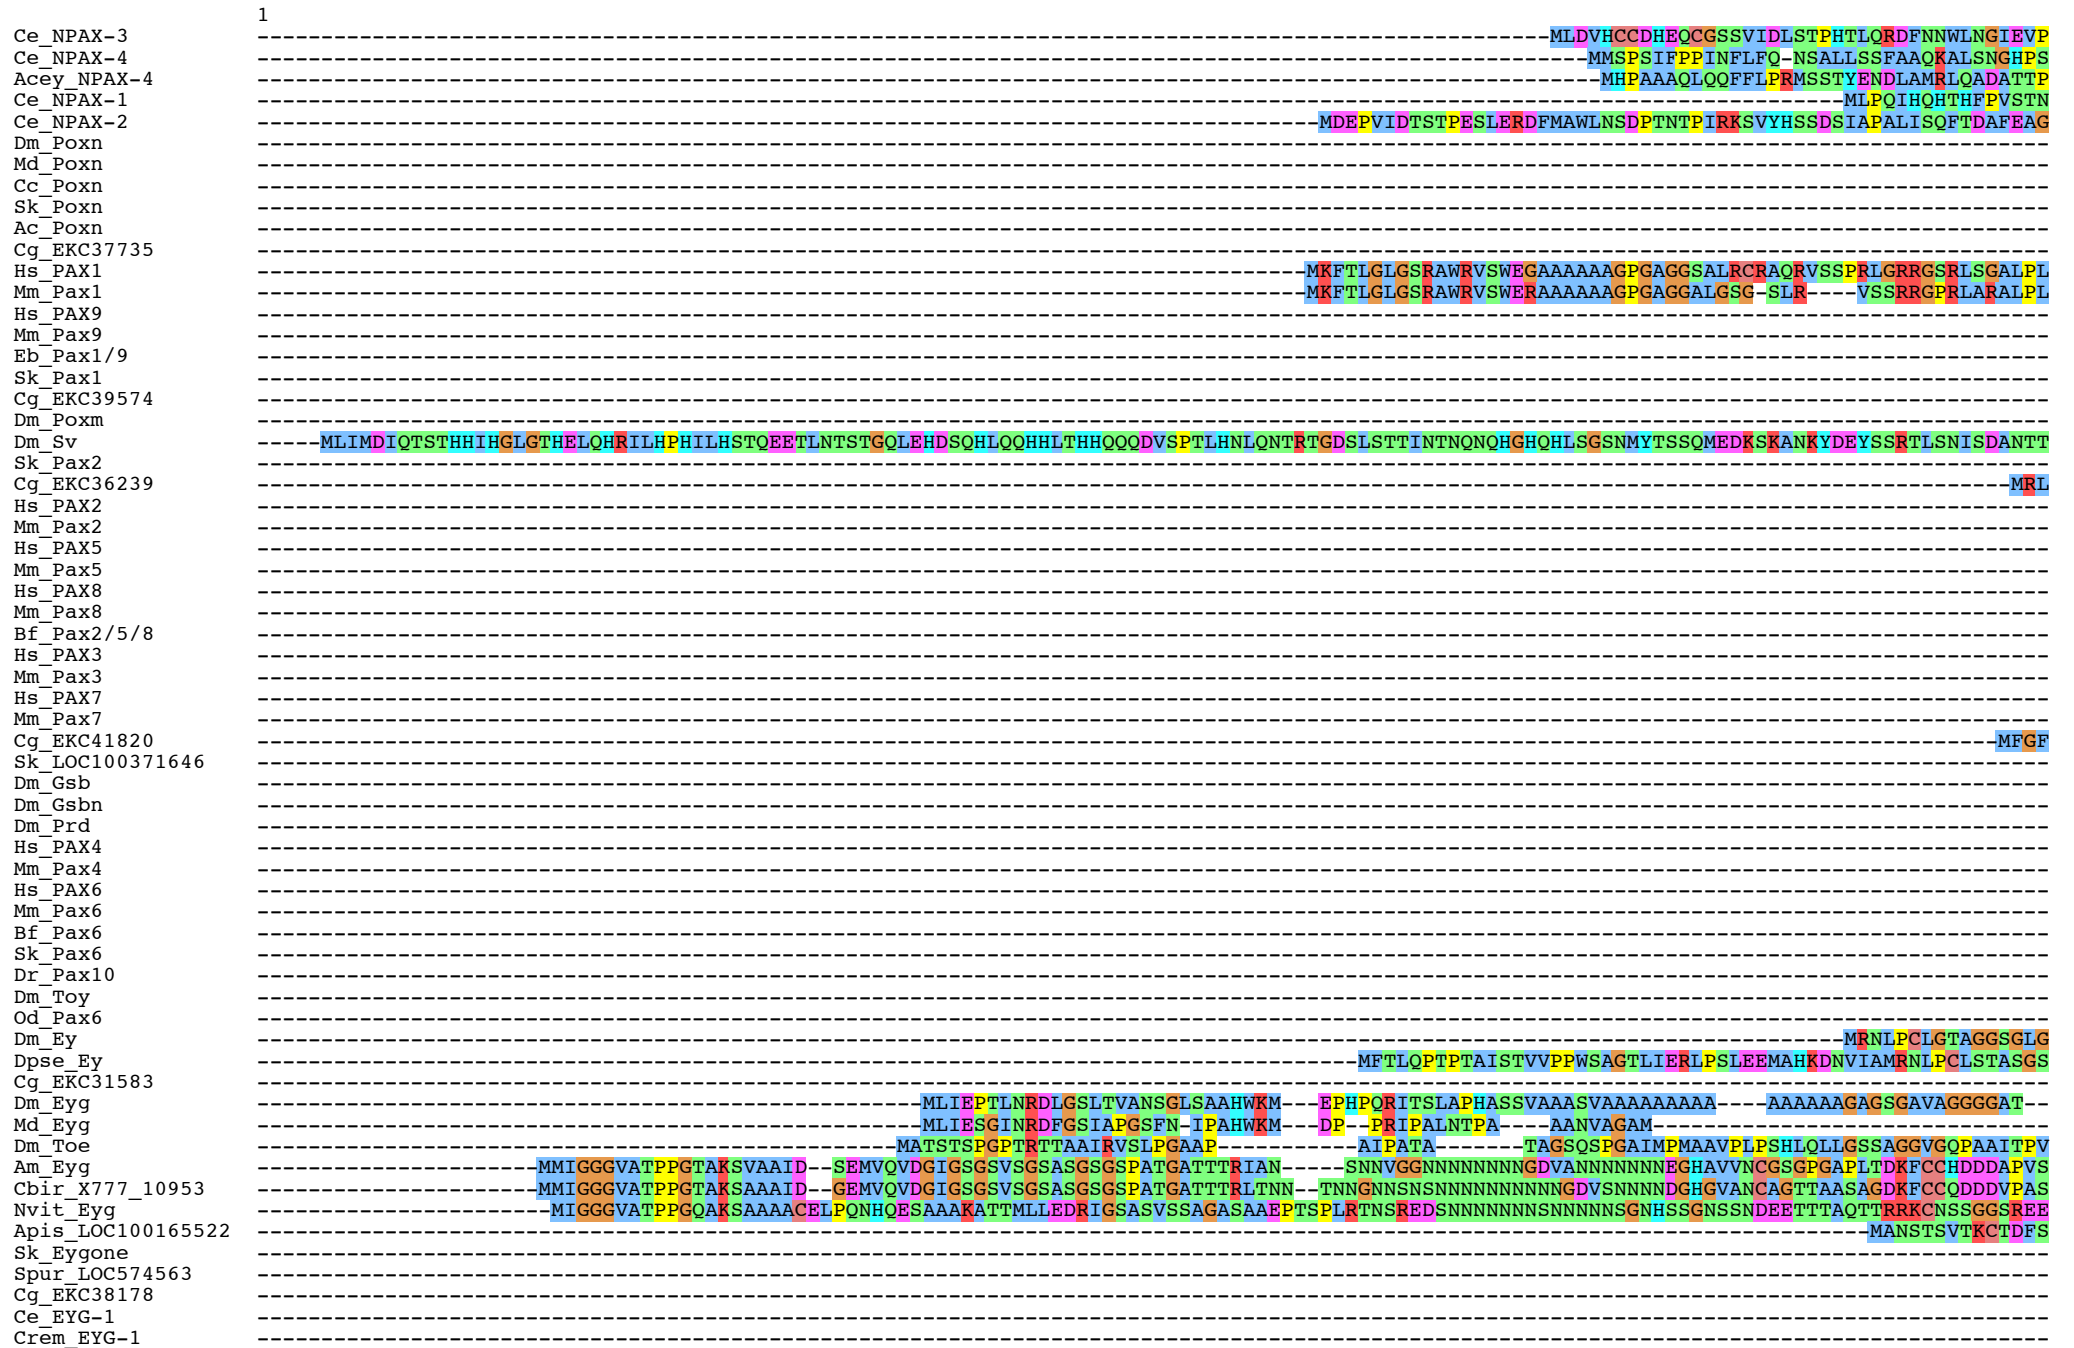

|                   | β 1                                                                                                                       | β 2 | α 1                                             | α 2              | α 3                     |
|-------------------|---------------------------------------------------------------------------------------------------------------------------|-----|-------------------------------------------------|------------------|-------------------------|
| Ce_NPAX-3         | NSYESQQSDSSSSVDESGSKTSSPTSMOQNPSODGRK-NRKKGTNLYGRPYCPGRPLS                                                                |     | MEERTRIIQIHLNN                                  | GMKV-NAISKSLC    | ISHGCVSKII-SRFRATGVLLP  |
| Ce_NPAX-4         | GSSLAALEKLSKAFRRPDLHIEKLASSCIDKQDLKMTNVVPSRNRYGRPYISGRPLL                                                                 |     | TCDRQKIVECYKK                                   | GMKK-IHIAKQLG    | ITHSCVSKII-RRYAEATGEIVA |
| Acey_NPAX-4       | HMENSSLNLLMLESFQAQSLSPRNPIMEAAVPSOPLLNVPYPSRNRYGRPYISGRPLL                                                                |     | TCDRQKIVQLFEN                                   | GMKK-IHIAKQLG    | ITHSCVSKII-RKYQDTGMVEA  |
| Ce_NPAX-1         | GSTGSPNNNTLPPPIIPYLLSFAFYSLSSANISTSPEINEGEKVKAVGRSYNPGRPLC                                                                |     | LEDKRIKIVRLYEE                                  | GCRV-SHIARLIG    | VTHSCVSKII-SRYRRTGSVQP  |
| Ce_NPAX-2         | MYNRYYPYPTSDSGSPSSLSGSSLDYDVPYPPYQYKEDVARSSGRNLGRYISGRLPLS                                                                |     | MCEREEIVKLFQE                                   | GWKI-CDISKRLC    | VTHSCVSKII-NRYRQTGSVKP  |
| Dm_Poxn           | -----MPHTGQAGVNQLGGVFNVRPLP                                                                                               |     | DCVRRRIVDLALC                                   | GVRP-CDISRQLL    | VSHGCVSKII-TRFYETGSIRP  |
| Md_Poxn           | -----MPHTGQAGVNQLGGVFNVRPLP                                                                                               |     | DCVRRRIVDELALC                                  | GVRP-CDISRQLL    | VSHGCVSKII-TRFYETGSIRP  |
| Cc_Poxn           | -----MPHTGQAGVNQLGGVFNVRPLP                                                                                               |     | DCVRRRIVQLALC                                   | GVRP-CDISRQLL    | VSHGCVSKII-TRFYETGSIRP  |
| Sk_Poxn           | -----MPHTGQAGVNQLGGVFNVRPLP                                                                                               |     | DFIRARIVELAHL                                   | GVRP-CDISRQLL    | VSHGCVSKII-TRFYETGSIRP  |
| Ac_Poxn           | -----MPHTGQAGVNQLGGVFNVRPLP                                                                                               |     | EHVRRRIVELAQM                                   | GVRP-CDISRQLL    | VSHGCVSKII-TRFYETGSIRP  |
| Cg_EKC37735       | -----MDPLOWGOTGVNQLGGVFNVRPLP                                                                                             |     | EHVRRRIVELAHM                                   | GVRP-CDISRQLL    | VSHGCVSKII-TRYETGSIKP   |
| Hs_PAX1           | CLSRGGGGAQALPDCAGPSPGHPGHGPGARQLAGPLAMEQTYGEVNQLGGVFNVRPLP                                                                |     | NAIRLRIVELAQL                                   | GIRP-CDISRQLR    | VSHGCVSKII-ARYNETGSILP  |
| Mm_Pax1           | CLSG-GGGARALPDCAGPSPRR--SGARQLAGPRAMEQTYGEVNQLGGVFNVRPLP                                                                  |     | NAIRLRIVELAQL                                   | GIRP-CDISRQLR    | VSHGCVSKII-ARYNETGSILP  |
| Hs_PAX9           | -----MEPAFGEVNQLGGVFNVRPLP                                                                                                |     | NAIRLRIVELAQL                                   | GIRP-CDISRQLR    | VSHGCVSKII-ARYNETGSILP  |
| Mm_Pax9           | -----MEPAFGEVNQLGGVFNVRPLP                                                                                                |     | NAIRLRIVELAQL                                   | GIRP-CDISRQLR    | VSHGCVSKII-ARYNETGSILP  |
| Eb_Pax1/9         | -----MDQTFGEVNQLGGVFNVRPLP                                                                                                |     | NAIRLRIVELAQL                                   | GIRP-CDISRQLR    | VSHGCVSKII-ARYNETGSILP  |
| Sk_Pax1           | -----MHYGMEOTFGEVNQLGGVFNVRPLP                                                                                            |     | NGIRLRIVELAQL                                   | GIRP-CDISRQLR    | VSHGCVSKII-ARYNETGSILP  |
| Cg_EKC39574       | -----MRKLLDTEQSTFGEVNQLGGVFNVRPLP                                                                                         |     | NAIRLRIVELAQL                                   | GVRP-CDISRQLR    | VSHGCVSKII-ARYNETGSILP  |
| Dm_Poxm           | -----MDPESQCPQYGEVNQLGGVFNVRPLP                                                                                           |     | NATRRRIVELARL                                   | GIRP-CDISRQLR    | VSHGCVSKII-ARYHETGSILP  |
| Dm_Sv             | PSANNFITOSQGIIEWITAMNDIONGAEDSHSSQGISIGDGHGGVNQLGGVFNVRPLP                                                                |     | DVVRQRIVELAHN                                   | GVRP-CDISRQLR    | VSHGCVSKII-SRYETGSFKA   |
| Sk_Pax2           | -----MPQSGRSGHGGVNQLGGVFNVRPLP                                                                                            |     | DVVRQRIVDLAHS                                   | GVRP-CDISRQLR    | VSHGCVSKII-GRYYETGSIKP  |
| Cg_EKC36239       | DFFSKAGIGLETMONTWAGFYGPPTFFPYQLQPRAYDVFAGHGGVNQLGGVFNVRPLP                                                                |     | DVVRQRIVELAHQ                                   | GVRP-CDISRQLR    | VSHGCVSKII-GRYYETGSIKP  |
| Hs_PAX2           | -----MDMHCKADPFSAMHPGHGGVNQLGGVFNVRPLP                                                                                    |     | DVVRQRIVELAHQ                                   | GVRP-CDISRQLR    | VSHGCVSKII-GRYYETGSIKP  |
| Mm_Pax2           | -----MDMHCKADPFSAMH-RHGGVNQLGGVFNVRPLP                                                                                    |     | DVVRQRIVELAHQ                                   | GVRP-CDISRQLR    | VSHGCVSKII-GRYYETGSIKP  |
| Hs_PAX5           | -----MDLEKNYPTPRTSRTGHGGVNQLGGVFNVRPLP                                                                                    |     | DVVRQRIVELAHQ                                   | GVRP-CDISRQLR    | VSHGCVSKII-GRYYETGSIKP  |
| Mm_Pax5           | -----MDLEKNYPTPRTIRTGHGGVNQLGGVFNVRPLP                                                                                    |     | DVVRQRIVELAHQ                                   | GVRP-CDISRQLR    | VSHGCVSKII-GRYYETGSIKP  |
| Hs_PAX8           | -----MPHNSIRSGHGLNQLGGAFVNGRPLP                                                                                           |     | EVVRQRIVDLAHQ                                   | GVRP-CDISRQLR    | VSHGCVSKII-GRYYETGSIRP  |
| Mm_Pax8           | -----MPHNSIRSGHGLNQLGGAFVNGRPLP                                                                                           |     | EVVRQRIVDLAHQ                                   | GVRP-CDISRQLR    | VSHGCVSKII-GRYYETGSIRP  |
| Bf_Pax2/5/8       | -----MDRMTTMAASGSMQOHHGDSGGHGGVNQLGGVFNVRPLP                                                                              |     | DVVRQRIVELAHQ                                   | GVRP-CDISRQLR    | VSHGCVSKII-RRYYETGSIKP  |
| Hs_PAX3           | MTTLGAVPRMMRPGPGQNYPRSGFPLEVSTPLGQGRVNQLGGVFNVRPLP                                                                        |     | NHIRHKIVEMAAH                                   | GIRP-CVISRQLR    | VSHGCVSKII-GRYYETGSIRP  |
| Mm_Pax3           | MTTLGAVPRMMRPGPGQNYPRSGFPLEVSTPLGQGRVNQLGGVFNVRPLP                                                                        |     | NHIRHKIVEMAAH                                   | GIRP-CVISRQLR    | VSHGCVSKII-CRYQETGSIRP  |
| Hs_PAX7           | MAALPGTVPRMMRPGPGQNYPRSGFPLEVSTPLGQGRVNQLGGVFNVRPLP                                                                       |     | NHIRHKIVEMAAH                                   | GIRP-CVISRQLR    | VSHGCVSKII-CRYQETGSIRP  |
| Mm_Pax7           | MAALPGTVPRMMRPGPGQNYPRSGFPLEVSTPLGQGRVNQLGGVFNVRPLP                                                                       |     | NHIRHKIVEMAAH                                   | GIRP-CVISRQLR    | VSHGCVSKII-CRYQETGSIRP  |
| Cg_EKC41820       | VNGFGVYLINERLIVRYPTAMFSYHLAALGLMPSFOMEGQGRVNQLGGVFNVRPLP                                                                  |     | NHIRLKIVELAAQ                                   | GVRP-CVISRQLR    | VSHGCVSKII-CRYQETGSIRP  |
| Sk_LOC100371646   | -----MTIQGRSFAAPGFPLEGQGRVNQLGGVFNVRPLP                                                                                   |     | NHIRYKIVEMAAH                                   | GIRP-CQISRQLR    | VSHGCVSKII-CRYQETGSIRP  |
| Dm_Gsb            | MAVSALNMTPYFGGYPFQOGRVNQLGGVFNVRPLP                                                                                       |     | NHIRRQIVEMAAA                                   | GVRP-CVISRQLR    | VSHGCVSKII-NRYQETGSIRP  |
| Dm_Gsbn           | -----MDMSSANSRLPLFAGYPFQOGRVNQLGGVFNVRPLP                                                                                 |     | NHIRLKIVEMAAAS                                  | GVRP-CVISRQLR    | VSHGCVSKII-NRYQETGSIRP  |
| Dm_Prd            | MTVTAFAAAMHRPFFNGYSTMDMNSGQGRVNQLGGVFNVRPLP                                                                               |     | NNIRLKIVEMAAD                                   | GIRP-CVISRQLR    | VSHGCVSKII-NRYQETGSIRP  |
| Hs_PAX4           | -----MHODGISSMNLGGLFVNGRPLP                                                                                               |     | LDTROQIVRLAVS                                   | GMRP-CDISRILK    | VSNCGVSKII-GRYYRTGVLEP  |
| Mm_Pax4           | -----MOQDGLSSVNQLGGLFVNGRPLP                                                                                              |     | LDTROQIVQLAIR                                   | GMRP-CDISRILK    | VSNCGVSKII-GRYYRTGVLEP  |
| Hs_PAX6           | -----MQNSHSGVNQLGGVFNVRPLP                                                                                                |     | DSTRQKIVELAHS                                   | GARP-CDISRILQ    | VSNCGVSKII-GRYYETGSIRP  |
| Mm_Pax6           | -----MQNSHSGVNQLGGVFNVRPLP                                                                                                |     | DSTRQKIVELAHS                                   | GARP-CDISRILQ    | VSNCGVSKII-GRYYETGSIRP  |
| Bf_Pax6           | -----MPHKAWTLORPADEHAQYSPVOADPGHSGVNQLGGVFNVRPLP                                                                          |     | DSTRRKIVELAHQ                                   | GARP-CDISRILQ    | VSNCGVSKII-GRYYETGSIRP  |
| Sk_Pax6           | -----MMEFSTDSANGHSGVNQLGGVFNVRPLP                                                                                         |     | DSTRQKIVELAHS                                   | GARP-CDISRILQ    | VSNCGVSKII-GRYYETGSIRP  |
| Dr_Pax10          | -----                                                                                                                     |     | -----                                           | -----            | -----                   |
| Dm_Toy            | -----MMLTTEHIMHGHPS--SVGQSTLFGCSTAGHSGINQLGGVFNVRPLP                                                                      |     | DSTRQKIVELAHS                                   | GARP-CDISRILQ    | VSNCGVSKII-GRYYETGSIKP  |
| Od_Pax6           | -----MEGLAAEDPMNRALTAQKNFYALDFSGSGLGHSVNQLGGVFNVRPLP                                                                      |     | DSLROKIVELAHS                                   | GARP-CDISRILQ    | VSNCGVSKII-ARYYETGSIKP  |
| Dm_Ey             | GIAGKPSPTMEAVEASTASHRHSTSSYFATYYHLTDDECHSGVNQLGGVFNVRPLP                                                                  |     | DSTRQKIVELAHS                                   | GARP-CDISRILQ    | VSNCGVSKII-GRYYETGSIRP  |
| Dpse_Ey           | GLGGKSATAMEAVDATTGAQPHSTSSYFTTYHYHLTDDECHSGVNQLGGVFNVRPLP                                                                 |     | DSTRQKIVELAHS                                   | GARP-CDISRILQ    | VSNCGVSKII-GRYYETGSIRP  |
| Cg_EKC31583       | -----MFVSLTDDTASNSVSGPDDVDSFNKRSRQRKHSVNQLGGVFNVRPLP                                                                      |     | DSTRQKIVELAHS                                   | GARP-CDISRILQ    | VSNCGVSKII-GRYYETGSIRP  |
| Dm_Eyg            | -----STSPTSQIIPP-----FGGGGTTGGIIPHAGGPTGSLTNT                                                                             |     | LMSQHRLLFEFSRFG                                 | GLRGY-DIAQHML    | TOQGAVSKLL-GSLRP        |
| Md_Eyg            | -----PPLHPNVGLVPS-----GQIP-GSAIFTGGANGQSPSTLSA                                                                            |     | LVSQORLLELSRFS                                  | GLRGY-DIAQHML    | TOQGAVSKLL-GSLRP        |
| Dm_Toe            | SPTAATTVLAQPHSLSPSTPILTOGAPPAAALGGIFCGGSA-AAGPGAASAAAATNLNA                                                               |     | LASQHRLLLELSRF                                  | GLRGY-DIAQHML    | TOQGAVSKLL-GTLRP        |
| Am_Eyg            | TGVARPEPPSPPTFSQTRSHLQVHPHHHQH--PAHHHQMTVPPVSLIDGVSLONCTAG                                                                |     | PFASGNNGGSSRRLELSHGLGALRHYNDLANHVLNLNQQGAVVTKLL | -----            | GTLRP                   |
| Cbir_X777_10953   | TGVTRPWEPPSPPTFSQTRSHLQVHPHHHQH--PAHHHQMTVPPVSLIDGVSLONCTAG                                                               |     | PFASGNNGGSSRRLELSHGLGALRHYNDLANHVLNLNQQGAVVTKLL | -----            | GTLRP                   |
| Nvit_Eyg          | RTTESSSAGQOQPSVARPWEHRHTAQPTAAQIAAVAAAHQHQQHPLPALIEGISLPCNGAGLFTSQTSGAGGNSNNSSSGGTGGSRRLELSHGLGALRHYNDLANHVLNLNQQGAVVTKLL |     | -----                                           | -----            | GTLRP                   |
| Apis_LOC100165522 | VSSLCRDMKTSPPDPAIVVGGTGTNMKLTPLAACARFSSNINGPTAITAVNGRPPPSSTSPSPSPSP                                                       |     | -----ATLRELYAMAASQHQHLSLLELSNR                  | -----YRGPPEIAHVF | -----NQOAVTKLL          |
| Sk_Eygone         | -----MDTTTVHPGLNGLPOLGGMFLNGRPLP                                                                                          |     | DPLRHRIVELAHC                                   | GTRP-CDISRQLL    | ISHGCVSKII-GRYYEMGAIRP  |
| Spur_LOC574563    | -----MAMQGTLPYGTFLPAEPGRLLA                                                                                               |     | EDLRGMVSMILPC                                   | NSRA-CDLTHPLLS   | IPOGYSKLF-GRLYEPTPTRS   |
| Cg_EKC38178       | -----MKLHENAPNLMSGFSNSASPSGVG                                                                                             |     | NDVAGKAALFRPY                                   | ALPP-SPSVRYLDRTS | PLPPVAHRVMWAPYIDSVIGNR  |
| Ce_EYG-1          | -----MAAQOPLS                                                                                                             |     | QEQLLHFVGAH                                     | NTMG-KMTRRTSQ    | SDGGKPSGNSNA            |
| Crem_EYG-1        | -----MASQOPLS                                                                                                             |     | QEQLLHFVGAH                                     | NTMG-KMTRRSQ     | HEPGKPPGNSNS            |

## P A I subdomain

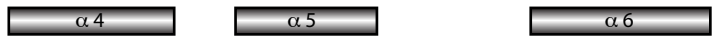

Table of protein sequences for various species including Ce\_NPAX-3, Dm\_Poxn, Hs\_PAX1, and others. The sequences are color-coded and aligned with domain markers alpha 4, alpha 5, and alpha 6. A linker region is also indicated.

linker R E D subdomain

|                   |                                                                                                                                           |
|-------------------|-------------------------------------------------------------------------------------------------------------------------------------------|
| Ce_NPAX-3         |                                                                                                                                           |
| Ce_NPAX-4         |                                                                                                                                           |
| Acey_NPAX-4       |                                                                                                                                           |
| Ce_NPAX-1         |                                                                                                                                           |
| Ce_NPAX-2         |                                                                                                                                           |
| Dm_Poxn           | APPTPAATPSIARYAKPPALMMNSAG                                                                                                                |
| Md_Poxn           | LPPATMALASSYRYADINMPTASNTPAHAAAS                                                                                                          |
| Cc_Poxn           | LHRASLTPLSTAHHAHTSTHLTAANAHPHNAAPHALTLPAQFRYSSAAAAAAMSAANESNRGNNAATTTQDARLLASFGSGVEMPIKPAK-HPVAAHMTALTGAGGSTSALAQLSATVSSAVSTGHLSPQDLSY-AA |
| Sk_Poxn           |                                                                                                                                           |
| Ac_Poxn           |                                                                                                                                           |
| Cg_EKC37735       |                                                                                                                                           |
| Hs_PAX1           |                                                                                                                                           |
| Mm_Pax1           |                                                                                                                                           |
| Hs_PAX9           |                                                                                                                                           |
| Mm_Pax9           |                                                                                                                                           |
| Eb_Pax1/9         |                                                                                                                                           |
| Sk_Pax1           |                                                                                                                                           |
| Cg_EKC39574       |                                                                                                                                           |
| Dm_Poxm           | LGHQHTPGTVMGSGSSSG                                                                                                                        |
| Dm_Sv             |                                                                                                                                           |
| Sk_Pax2           |                                                                                                                                           |
| Cg_EKC36239       |                                                                                                                                           |
| Hs_PAX2           |                                                                                                                                           |
| Mm_Pax2           |                                                                                                                                           |
| Hs_PAX5           |                                                                                                                                           |
| Mm_Pax5           |                                                                                                                                           |
| Hs_PAX8           |                                                                                                                                           |
| Mm_Pax8           |                                                                                                                                           |
| Bf_Pax2/5/8       |                                                                                                                                           |
| Hs_PAX3           |                                                                                                                                           |
| Mm_Pax3           |                                                                                                                                           |
| Hs_PAX7           |                                                                                                                                           |
| Mm_Pax7           |                                                                                                                                           |
| Cg_EKC41820       |                                                                                                                                           |
| Sk_LOC100371646   |                                                                                                                                           |
| Dm_Gsb            |                                                                                                                                           |
| Dm_Gsbn           |                                                                                                                                           |
| Dm_Prd            |                                                                                                                                           |
| Hs_PAX4           |                                                                                                                                           |
| Mm_Pax4           |                                                                                                                                           |
| Hs_PAX6           |                                                                                                                                           |
| Mm_Pax6           |                                                                                                                                           |
| Bf_Pax6           |                                                                                                                                           |
| Sk_Pax6           |                                                                                                                                           |
| Dr_Pax10          |                                                                                                                                           |
| Dm_Toy            |                                                                                                                                           |
| Od_Pax6           |                                                                                                                                           |
| Dm_Ey             |                                                                                                                                           |
| Dpse_Ey           | LSSSTDLMQ                                                                                                                                 |
| Cg_EKC31583       | LSSGGDLMQ                                                                                                                                 |
| Dm_Eyg            |                                                                                                                                           |
| Md_Eyg            |                                                                                                                                           |
| Dm_Toe            |                                                                                                                                           |
| Am_Eyg            |                                                                                                                                           |
| Cbir_X777_10953   |                                                                                                                                           |
| Nvit_Eyg          |                                                                                                                                           |
| Apis_LOC100165522 |                                                                                                                                           |
| Sk_Eygone         |                                                                                                                                           |
| Spur_LOC574563    | TEQA                                                                                                                                      |
| Cg_EKC38178       |                                                                                                                                           |
| Ce_EYG-1          |                                                                                                                                           |
| Crem_EYG-1        |                                                                                                                                           |
